# Supplementary material for: CoMoO4 as a novel heterogeneous catalyst of peroxymonosulfate activation for the degradation of organic dyes
Source: Royal Society of Chemistry journal article supplement (doi:10.1039/c7ra04761d), 2017-01-01
Supplement: c7ra04761d1.pdf [file c7ra04761d1.pdf]

Electronic Supplementary Material (ESI) for RSC Advances.  
This journal is © The Royal Society of Chemistry 2017

## **CoMoO<sub>4</sub> as a novel heterogeneous catalyst of peroxymonosulfate activation for the degradation of organic dyes**

Yanan Fan, WenjieMa, Jianglong He, Yunchen Du\*

MIIT Key Laboratory of Critical Materials Technology for New Energy Conversion and Storage,  
School of Chemistry and Chemical Engineering, Harbin Institute of Technology, Harbin 150001,  
China.

\* Corresponding Authors:

Prof. Y.C. Du

Harbin Institute of Technology, No.92, West Dazhi Street, Nan'gang District, Harbin,  
Tel: +86-451-86413702; Fax: +86-451-86418750

Email: [yunchendu@hit.edu.cn](mailto:yunchendu@hit.edu.cn).

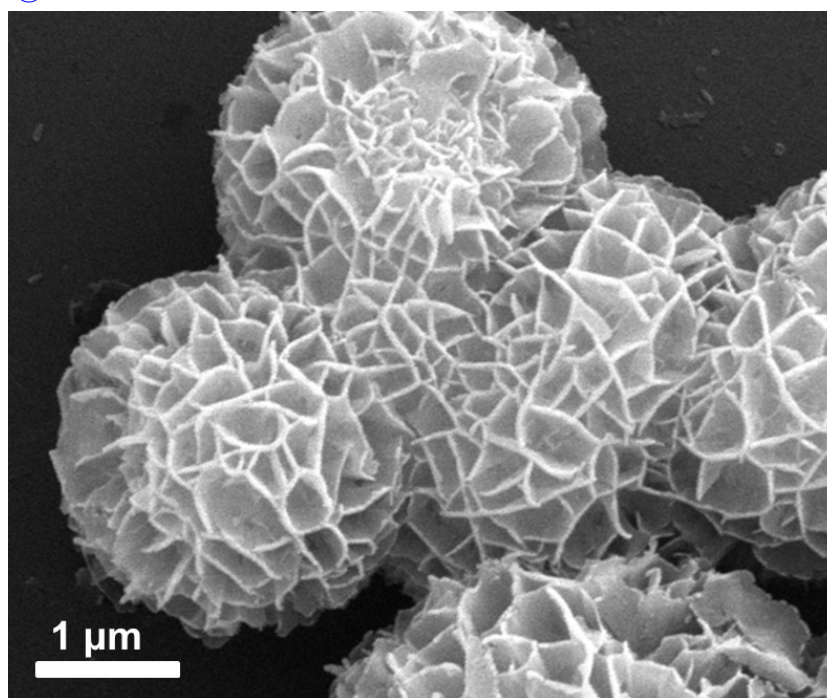

**Fig S1** SEM pattern of uncalcined precursor.



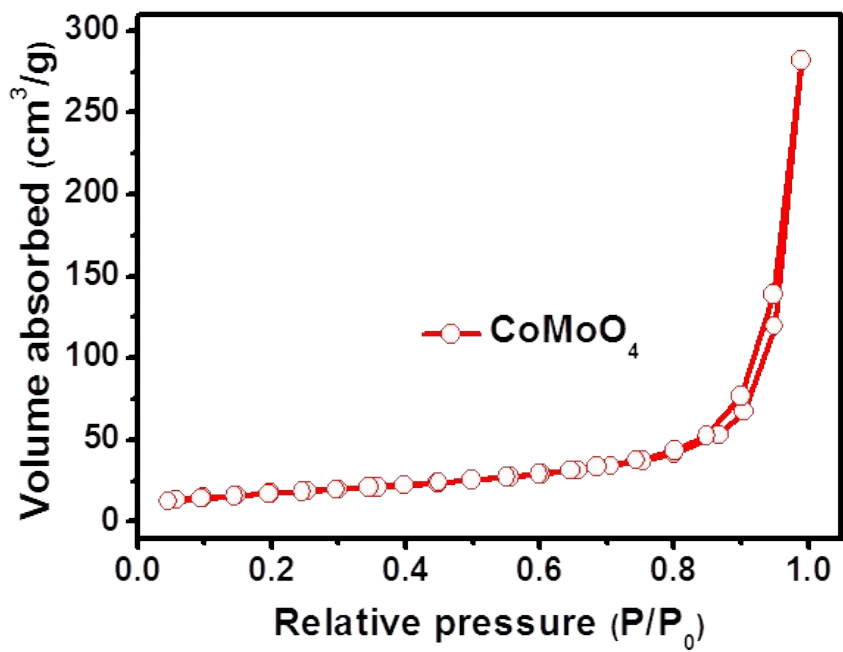

Fig S2 N<sub>2</sub> adsorption/desorption isotherm of CoMoO<sub>4</sub>.

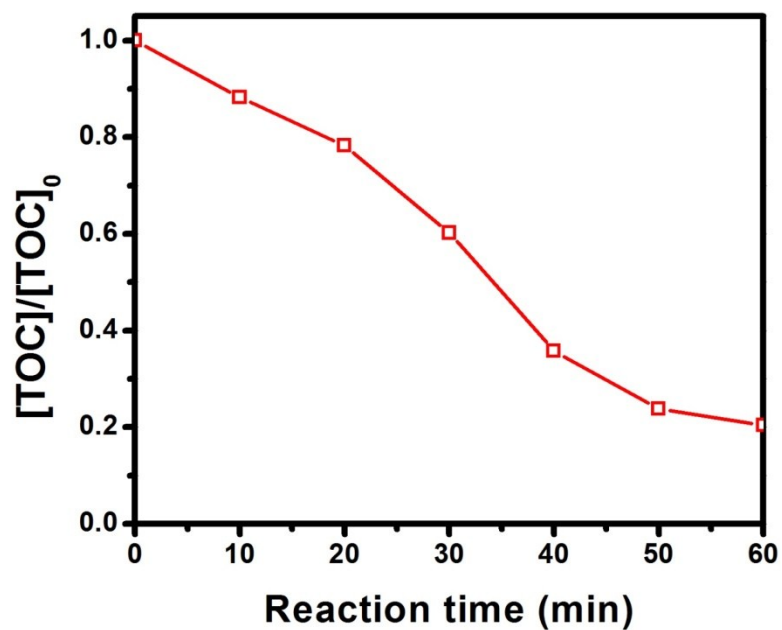

**Fig S3** TOC removal in MB degradation catalyzed by  $CoMoO_4/PMS$  systems. Conditions:  $[MB]_0 = 100$  mg/L, volume (MB) = 50 mL,  $[Oxone] = 2$  mM, catalyst amount = 0.05 g (0.10 g/L), temperature= $25^\circ C$ , without pH adjustment.

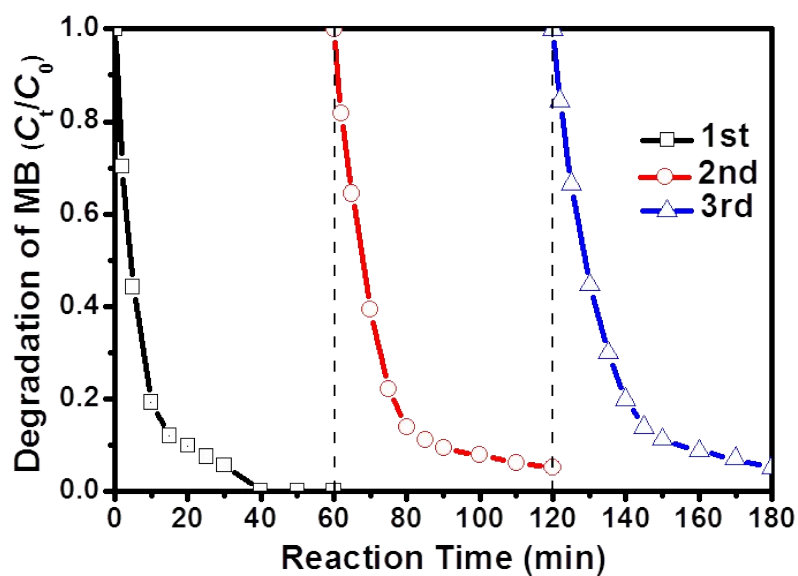

**Fig S4** Degradation of MB in  $\text{CoMoO}_4/\text{PMS}$  system for catalyst recycling experiment. Conditions:  $[\text{MB}]_0 = 100 \text{ mg/L}$ , volume (MB) = 50 mL,  $[\text{Oxone}] = 2\text{mM}$ , catalyst amount = 0.05 g (0.10 g/L), temperature= $25^\circ\text{C}$ , without pH adjustment.

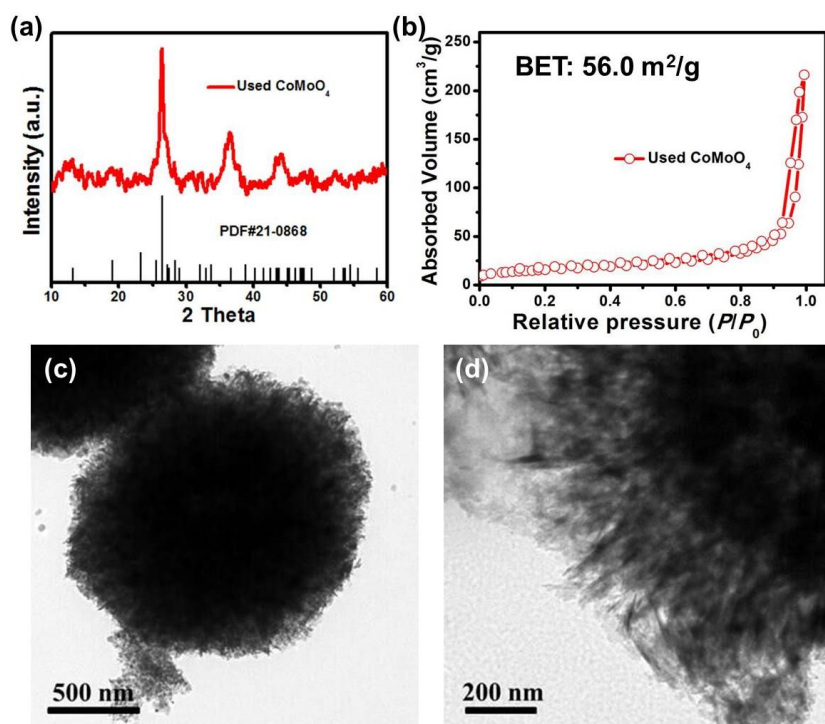

**Fig S5** XRD pattern (a),  $\text{N}_2$  adsorption/desorption isotherm (b), TEM images (c and d) of the used  $\text{CoMoO}_4$ .

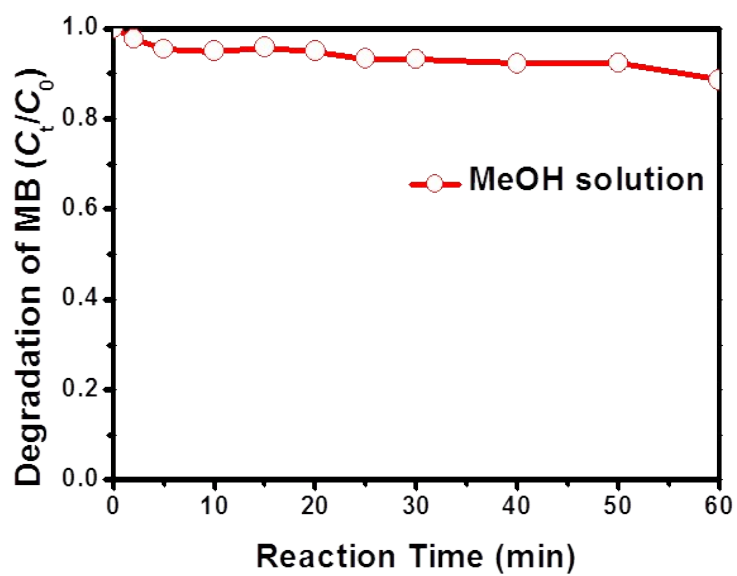

**Fig S6** MB degradation in MeOH solution. Conditions:  $[MB]_0 = 100$  mg/L, volume (MB) = 50 mL,  $[Oxone] = 2$  mM, catalyst amount = 0.05 g (0.10 g/L), temperature =  $25^\circ\text{C}$ , without pH adjustment.

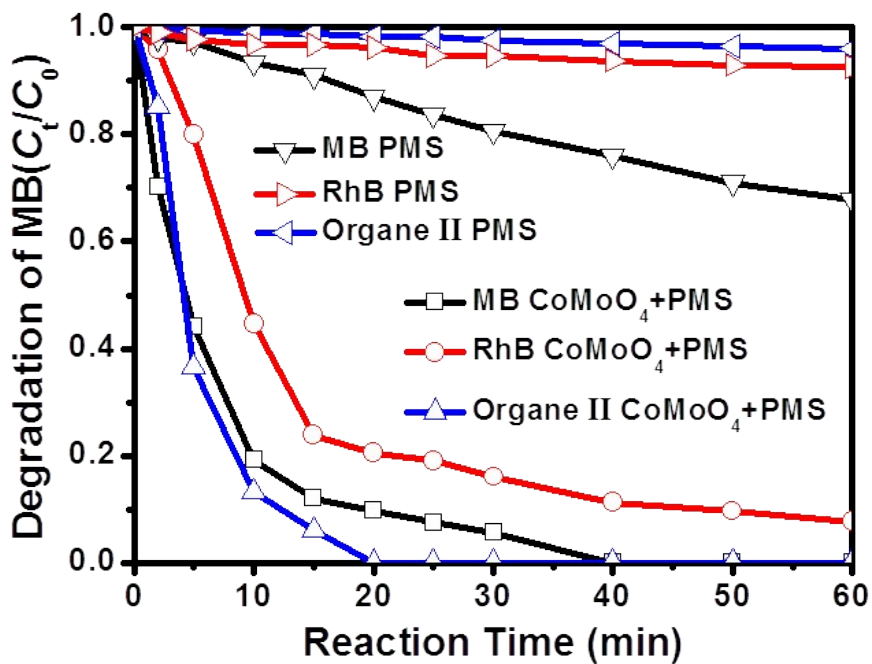

**Fig S7** Degradation in various dyes by CoMoO<sub>4</sub>/PMS system. Conditions: [dye]<sub>0</sub> = 100 mg/L, volume (dye) = 50 mL, [Oxone] = 2mM, catalyst amount = 0.05 g (0.10 g/L), temperature=25°C, without pH adjustment.



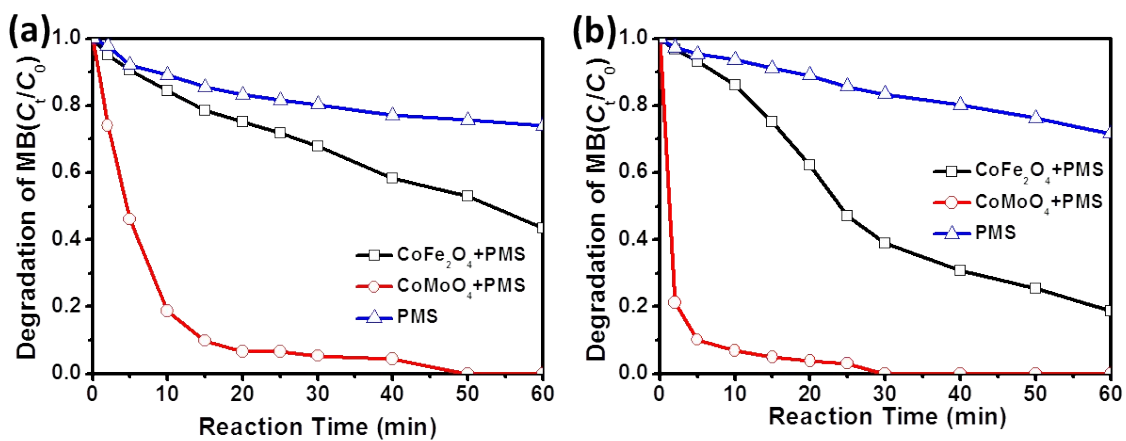

**Fig S8** MB degradation by CoMoO<sub>4</sub>/PMS system under some actual water background: tap water (a), surface water (b). Conditions: [MB]<sub>0</sub> = 100 mg/L, volume (MB) = 50 mL, [Oxone] = 2mM, catalyst amount = 0.05 g (0.10 g/L), temperature=25°C, without pH adjustment.

## Tables

**Table S1** The performances of various catalysts in PMS activation for MB degradation.

| Catalyst                                                            | MB<br>(mg/L) | PMS<br>(mM) | Cat. dosage<br>(g/L) | MB:PMS:Cat.<br>(mg/L:mM:g/L) | Time <sup>a</sup><br>(min) | REF           |
|---------------------------------------------------------------------|--------------|-------------|----------------------|------------------------------|----------------------------|---------------|
| Co <sub>3</sub> O <sub>4</sub> -Bi <sub>2</sub> O <sub>3</sub>      | 7.50         | 0.50        | 0.05                 | 1:0.0670:0.0067              | 10                         | 1             |
| activated RGO                                                       | 10.0         | 1.64        | 0.06                 | 1:0.1640:0.0060              | 60                         | 2             |
| Co <sub>3</sub> O <sub>4</sub> /titanate                            | 10.0         | 0.50        | 0.50                 | 1:0.0500:0.0500              | 10                         | 3             |
| RGO-CO <sub>2</sub>                                                 | 10.0         | 3.29        | 0.05                 | 1:0.3290:0.0050              | 175                        | 4             |
| CuFe <sub>2</sub> O <sub>4</sub> /AC                                | 20.0         | 6.50        | 0.50                 | 1:0.3250:0.0025              | 60                         | 5             |
| Fe <sub>3</sub> O <sub>4</sub> @OMS-2                               | 20.0         | 2.63        | 0.40                 | 1:0.1315:0.0200              | 15 (95.0%)                 | 6             |
| Fe <sub>3</sub> O <sub>4</sub> /Mn <sub>3</sub> O <sub>4</sub> /rGO | 50.0         | 1.97        | 0.10                 | 1:0.0394:0.0020              | 30 (93.5%)                 | 7             |
| Fe <sub>3</sub> O <sub>4</sub> @MnO <sub>2</sub>                    | 30.0         | 20.0        | 0.30                 | 1:0.6670:0.0100              | 30                         | 8             |
| Co/IBA                                                              | 37.4         | 2.00        | 1.00                 | 1:0.0535:0.0267              | 10                         | 9             |
| NiCo <sub>2</sub> O <sub>4</sub>                                    | 18.7         | 0.50        | 0.20                 | 1:0.0267:0.0107              | 40                         | 10            |
| Cu/Fe <sub>3</sub> O <sub>4</sub>                                   | 7.50         | 2.50        | 0.10                 | 1:0.3333:0.0133              | 30                         | 11            |
| PPy/CNTs-CoFe <sub>2</sub> O <sub>4</sub>                           | 100.0        | 4.00        | 1.00                 | 1:0.0400:0.0100              | 60 (95.0%)                 | 12            |
| Cobalt phosphonate                                                  | 93.5         | 5.00        | 0.10                 | 1:0.4810:0.0011              | 25                         | 13            |
| <b>CoMoO<sub>4</sub></b>                                            | <b>100.0</b> | <b>2.00</b> | <b>0.10</b>          | <b>1:0.0200:0.0010</b>       | <b>40</b>                  | <b>Herein</b> |

<sup>a</sup> Time required for complete degradation of MB.

## References

- [1] Y. B. Ding, L. H. Zhu, A. Z. Huang, X. R. Zhao, X. Y. Zhang and H. Q. Tang. A heterogeneous Co<sub>3</sub>O<sub>4</sub>-Bi<sub>2</sub>O<sub>3</sub> composite catalyst for oxidative degradation of organic pollutants in the presence of peroxymonosulfate. *Catal. Sci. Technol.*, 2012, **2**, 1977-1984.
- [2] W. C. Peng, S. Z. Li, H. Q. Sun, Y. J. Yao, L. J. Zhi and S. B. Wang. Synthesis of porous reduced graphene oxide as metal-free carbon for adsorption and catalytic oxidation of organics in water. *J. Mater. Chem. A*, 2013, **1**, 5854-5859.
- [3] Z. L. Chen, S. H. Chen, Y. H. Li, X. L. Si, J. Huang, S. Massery and G. L. Chen. A recyclable and highly active Co<sub>3</sub>O<sub>4</sub> nanoparticles/titanate nanowire catalyst for organic dyes degradation with peroxymonosulfate. *Mater. Res. Bull.*, 2014, **57**, 170-176.
- [4] S. Z. Liu, W. C. Peng, H. Q. Sun and S. B. Wang. Physical and chemical activation of reduced graphene oxide for enhanced adsorption and catalytic oxidation. *Nanoscale*, 2014, **6**, 766-771.
- [5] W. D. Oh, S. K. Lua, Z. L. Dong and T. K. Lim. Performance of magnetic activated carbon composite as peroxymonosulfate activator and regenerable adsorbent via sulfate radical-mediated oxidation processes. *J. Hazard. Mater.*, 2015, **284**, 1-9.
- [6] M. Y. Wei, Y. Ruan, S. L. Luo, X. X. Li, A. H. Xu and P. Zhang. The facile synthesis of a magnetic OMS-2 catalyst for decomposition of organic dyes in aqueous solution with peroxymonosulfate. *New J. Chem.*, 2015, **39**,

6395-6403.

- [7] B. Yang, Z. Tian, B. Wang, Z. B. Sun, L. Zhang, Y. P. Guo, H. Z. Li and S. Q. Yan. Facile synthesis of Fe<sub>3</sub>O<sub>4</sub>/hierarchical-Mn<sub>3</sub>O<sub>4</sub>/graphene oxide as a synergistic catalyst for activation of peroxymonosulfate for degradation of organic pollutants. *RSC Adv.*, 2015, **5**, 20674-20683.
- [8] S. W. Zhang, Q. H. Fan, H. H. Gao, Y. S. Huang, X. Liu, J. X. Li, X. J. Xu and X. K. Wang. Formation of Fe<sub>3</sub>O<sub>4</sub>@MnO<sub>2</sub> ball-in-ball hollow spheres as a high performance catalyst with enhanced catalytic performances. *J. Mater. Chem. A*, 2016, **4**, 1414-1422.
- [9] Y. B. Wang, Y. Xie, S. M. Yin, R. Xu and R. Lau. Municipal solid waste incineration bottom ash supported cobalt oxide catalysts for dye degradation using sulfate radical. *J. Taiwan Inst. Chem. E.*, 2016, **68**, 246-253.
- [10] W. W. Zhang, Y. Su, X. M. Zhang, Y. Yang and X. H. Guo. Facile synthesis of porous NiCo<sub>2</sub>O<sub>4</sub> nanoflakes as magnetic recoverable catalysts towards the efficient degradation of RhB. *RSC Adv.*, 2016, **6**, 64626-64633.
- [11] G. Nie, J. Huang, Y. Z. Hu, Y. B. Ding, X. Y. Han and H. Q. Tang. Heterogeneous catalytic activation of peroxymonosulfate for efficient degradation of organic pollutants by magnetic Cu<sup>0</sup>/Fe<sub>3</sub>O<sub>4</sub> submicron composites. *Chinese J. Catal.*, 2017, **38**, 227-239.
- [12] X. L. Li, H. J. Lu, Y. Zhang and F. He. Efficient removal of organic pollutants from aqueous media using newly synthesized polypyrrole/CNTs-CoFe<sub>2</sub>O<sub>4</sub> magnetic nanocomposites. *Chem. Eng. J.*, 2017, **316**, 893-902.
- [13] Y. P. Zhu, T. Z. Ren and Z. Y. Yuan. Hollow cobalt phosphonate spherical hybrid as high-efficiency Fenton catalyst. *Nanoscale*, 2014, **6**, 11395-11402.

**Table S2** Kinetic rate constants of MB degradation at different temperature.

| Temperature         | 15°C    | 25°C    | 30°C    | 35°C    |
|---------------------|---------|---------|---------|---------|
| K/min <sup>-1</sup> | 0.05627 | 0.14387 | 0.23567 | 0.42979 |

**Table S3** Parameters of actual water bodies

|            | Tap water | Surface water |
|------------|-----------|---------------|
| TOC (mg/L) | 5.62      | 6.46          |
| TN (mg/L)  | 1.39      | 1.50          |
| Al (mg/L)  | 0.450     | 0.272         |
| Ca (mg/L)  | 10.532    | 24.457        |
| Cu (mg/L)  | 0.016     | 0.004         |
| Fe (mg/L)  | 0.075     | 0.023         |
| Mg (mg/L)  | 1.566     | 6.157         |
| Mn (mg/L)  | 0.005     | 0.002         |
